# Supplementary material
Source: publisher figshare collection journal article supplement (https://acs.figshare.com/ndownloader/files/5168647)
Supplement: Supplementary file 1 [file 5168647]

data_General                         'AcGlcDPA-Cu'
_audit_creation_date                  '2003-08-08'
_audit_creation_method                'by CrystalStructure v3.00'
_audit_update_record                  '2003-08-08'

#==============================================================================

# PROCESSING SUMMARY (IUCr Office Use Only)

_journal_date_recd_electronic     ?
_journal_date_from_coeditor       ?
_journal_date_accepted            ?
_journal_coeditor_code            ?

#==============================================================================

# SUBMISSION DETAILS

_publ_contact_author_name             'Yuji Mikata'
_publ_contact_author_email            'mikata@cc.nara-wu.ac.jp'
_publ_contact_author_fax              '+81-742-20-3095'
_publ_contact_author_phone           '+81-742-20-3095'
_publ_contact_letter
;
    ENTER TEXT OF LETTER
;
_publ_requested_journal               'ENTER JOURNAL NAME HERE'
_publ_requested_category              'CHOOSE FI FM FO CI CM CO or AD'
_publ_requested_coeditor_name          ?

#==============================================================================

# TITLE AND AUTHOR LIST

_publ_section_title
;
    ENTER SECTION TITLE
;
_publ_section_title_footnote
;
    ENTER FOOTNOTE TO TITLE OF PAPER
;
loop_
_publ_author_name
_publ_author_footnote
_publ_author_address
' FIRST AUTHORS NAME '
;
  FIRST AUTHORS FOOTNOTES
;
;
  FIRST AUTHORS ADDRESS
;
_publ_section_synopsis
;
  ENTER SYNOPSIS
;

#==============================================================================

# TEXT

_publ_section_abstract
;
    ENTER ABSTRACT
;
_publ_section_comment
;
    ENTER TEXT
;
_publ_section_references
;
    ENTER OTHER REFERENCES

    Rigaku/MSC and Rigaku Corporation. (2001).
    CrystalStructure.
    Single Crystal Structure Analysis Software. Version 3.00.
    Rigaku/MSC, 9009 New Trails Drive, The Woodlands, TX, USA 77381-5209.
    Rigaku, 3-9-12 Akishima, Tokyo 196-8666, Japan.

    Watkin, D.J., Prout, C.K. Carruthers, J.R. & Betteridge, P.W., 
    CRYSTALS Issue 10, Chemical Crystallography Laboratory, Oxford, UK.

;
_publ_section_figure_captions
;
    ENTER FIGURE CAPTIONS
;
_publ_section_exptl_prep
;
    ENTER COMPOUND PREPARATION DETAILS
;
_publ_section_exptl_refinement
;
    ENTER SPECIAL DETAILS OF THE REFINEMENT
;

#==============================================================================

data___AcGDPA-CuNO3-AcOH

#==============================================================================

# CHEMICAL DATA

_chemical_formula_sum                  'C28 H35 Cu N5 O16 '
_chemical_formula_moiety               'C28 H35 Cu N5 O16 '
_chemical_formula_weight               761.15
_chemical_melting_point                ?

#==============================================================================

# CRYSTAL DATA
_symmetry_cell_setting                 monoclinic
_symmetry_space_group_name_H-M        'P 1 21 1'
_symmetry_Int_Tables_number            4
loop_
_symmetry_equiv_pos_as_xyz
 'x,y,z'
 '-x,y+1/2,-z'

#------------------------------------------------------------------------------

_cell_length_a                         10.0348(7)
_cell_length_b                         13.5631(9)
_cell_length_c                         12.4213(10)
_cell_angle_alpha                      90
_cell_angle_beta                       95.336(4)
_cell_angle_gamma                      90
_cell_volume                           1683.2(2)
_cell_formula_units_Z                  2
_cell_measurement_reflns_used          5949
_cell_measurement_theta_min            3.1
_cell_measurement_theta_max            27.5
_cell_measurement_temperature          173.1

#------------------------------------------------------------------------------

_exptl_crystal_description            'prism'
_exptl_crystal_colour                 'blue'
_exptl_crystal_size_max                0.40
_exptl_crystal_size_mid                0.20
_exptl_crystal_size_min                0.20
_exptl_crystal_density_diffrn          1.502
_exptl_crystal_density_meas            ?
_exptl_crystal_density_method         'not measured'
_exptl_crystal_F_000                   790.00
_exptl_absorpt_coefficient_mu          0.730
_exptl_absorpt_correction_type         none
_exptl_absorpt_correction_T_min        0.798
_exptl_absorpt_correction_T_max        0.864

#==============================================================================

# EXPERIMENTAL DATA

_diffrn_radiation_type                'Mo Kalpha'
_diffrn_radiation_wavelength           0.7107
_diffrn_measurement_device_type       'Rigaku Mercury'
_diffrn_measurement_method             omega
_diffrn_detector_area_resol_mean       14.62
_diffrn_reflns_number                  13134
_diffrn_reflns_av_R_equivalents        0.042
_diffrn_reflns_theta_max               27.48
_diffrn_measured_fraction_theta_max    0.9878
_diffrn_reflns_theta_full              27.48
_diffrn_measured_fraction_theta_full   0.9878
_diffrn_reflns_limit_h_min             -12
_diffrn_reflns_limit_h_max             13
_diffrn_reflns_limit_k_min             -17
_diffrn_reflns_limit_k_max             17
_diffrn_reflns_limit_l_min             -15
_diffrn_reflns_limit_l_max             16

#==============================================================================

# REFINEMENT DATA

_refine_special_details
;
    Refinement using reflections with F^2^ > 0.0 sigma(F^2^).
    The weighted R-factor (wR) and goodness of fit (S) are based on F^2^.
    R-factor (gt) are based on F. The threshold expression of
    F^2^ > 2.0 sigma(F^2^) is used only for calculating R-factor (gt).
;
_reflns_number_total                   3937
_reflns_number_gt                      3729
_reflns_threshold_expression           F^2^>2.0sigma(F^2^)
_refine_ls_structure_factor_coef       Fsqd
_refine_ls_R_factor_gt                 0.0330
_refine_ls_wR_factor_ref               0.0730
_refine_ls_hydrogen_treatment          refall
_refine_ls_number_reflns               3968
_refine_ls_number_parameters           486
_refine_ls_goodness_of_fit_ref         0.951
_refine_ls_weighting_scheme            calc
_refine_ls_weighting_details
'w = 1/[0.0001Fo^2^ + 2.0000sigma^2^(Fo) + 0.5000]/(4Fo^2^)'
_refine_ls_shift/su_max                0.0000
_refine_diff_density_max               0.34
_refine_diff_density_min               -0.37
_refine_ls_extinction_method           none
_refine_ls_extinction_coef             ?
_refine_ls_abs_structure_details       ?
_refine_ls_abs_structure_Flack         ?

loop_
_atom_type_symbol
_atom_type_description
_atom_type_scat_dispersion_real
_atom_type_scat_dispersion_imag
_atom_type_scat_source
  'C' 'C'  0.006 0.003 
;
International Tables for Crystallography
(1992, Vol. C, Tables 4.2.6.8 and 6.1.1.4)
;
  'H' 'H'  0.000 0.000 
;
International Tables for Crystallography
(1992, Vol. C, Table 6.1.1.4)
;
  'Cu' 'Cu'  0.284 1.430 
;
International Tables for Crystallography
(1992, Vol. C, Tables 4.2.6.8 and 6.1.1.4)
;
  'N' 'N'  0.011 0.006 
;
International Tables for Crystallography
(1992, Vol. C, Tables 4.2.6.8 and 6.1.1.4)
;
  'O' 'O'  0.017 0.010 
;
International Tables for Crystallography
(1992, Vol. C, Tables 4.2.6.8 and 6.1.1.4)
;

#==============================================================================

# ATOMIC COORDINATES AND THERMAL PARAMETERS

loop_
_atom_site_label
_atom_site_type_symbol
_atom_site_fract_x
_atom_site_fract_y
_atom_site_fract_z
_atom_site_U_iso_or_equiv
_atom_site_adp_type
_atom_site_occupancy
_atom_site_symmetry_multiplicity
_atom_site_calc_flag
_atom_site_refinement_flags
_atom_site_disorder_assembly
_atom_site_disorder_group
 Cu1    Cu -0.62928(4) -0.22007(4) -0.62521(3) 0.02870(8)  Uani 1.00 1 d . . .
 O1     O  -0.4225(2)  -0.1345(2)  -0.6462(2)  0.0279(5)   Uani 1.00 1 d . . .
 O2     O  -0.1857(2)  -0.1882(2)  -0.5210(2)  0.0305(5)   Uani 1.00 1 d . . .
 O3     O  -0.0593(2)  -0.3625(2)  -0.6037(2)  0.0310(6)   Uani 1.00 1 d . . .
 O4     O  -0.0518(2)  -0.3569(2)  -0.8317(2)  0.0380(7)   Uani 1.00 1 d . . .
 O5     O  -0.3531(2)  -0.2151(2)  -0.7917(2)  0.0325(5)   Uani 1.00 1 d . . .
 O6     O  -0.3856(3)  -0.3711(2)  -0.9380(2)  0.0422(7)   Uani 1.00 1 d . . .
 O7     O  -0.2331(3)  -0.3161(2)  -0.4160(2)  0.0446(7)   Uani 1.00 1 d . . .
 O8     O  0.1090(3)   -0.2623(2)  -0.5475(4)  0.0925(13)  Uani 1.00 1 d . . .
 O9     O  -0.1190(4)  -0.5136(2)  -0.8386(3)  0.0646(11)  Uani 1.00 1 d . . .
 O10    O  -0.3764(4)  -0.4173(2)  -1.1092(2)  0.0612(9)   Uani 1.00 1 d . . .
 O11    O  -0.5426(2)  -0.3491(2)  -0.6237(2)  0.0374(6)   Uani 1.00 1 d . . .
 O12    O  -0.7395(3)  -0.4090(3)  -0.6711(3)  0.0646(10)  Uani 1.00 1 d . . .
 O13    O  -0.5707(4)  -0.5046(2)  -0.6461(3)  0.0805(12)  Uani 1.00 1 d . . .
 O14    O  -0.2528(4)  0.0781(4)   -0.8315(4)  0.111(2)    Uani 1.00 1 d . . .
 O15    O  -0.0508(7)  0.1248(4)   -0.8325(4)  0.144(2)    Uani 1.00 1 d . . .
 O16    O  -0.0944(4)  -0.0223(3)  -0.8029(3)  0.0764(12)  Uani 1.00 1 d . . .
 N1     N  -0.7004(3)  -0.0793(2)  -0.6203(2)  0.0317(7)   Uani 1.00 1 d . . .
 N2     N  -0.6133(2)  -0.2040(2)  -0.4669(2)  0.0301(7)   Uani 1.00 1 d . . .
 N3     N  -0.6889(3)  -0.2089(2)  -0.7807(2)  0.0331(7)   Uani 1.00 1 d . . .
 N4     N  -0.6203(3)  -0.4238(2)  -0.6471(3)  0.0372(8)   Uani 1.00 1 d . . .
 N5     N  -0.1355(5)  0.0617(3)   -0.8216(3)  0.0553(12)  Uani 1.00 1 d . . .
 C1     C  -0.3091(3)  -0.1669(2)  -0.6932(2)  0.0276(8)   Uani 1.00 1 d . . .
 C2     C  -0.2365(3)  -0.2411(2)  -0.6173(2)  0.0253(7)   Uani 1.00 1 d . . .
 C3     C  -0.1194(3)  -0.2847(2)  -0.6703(3)  0.0286(7)   Uani 1.00 1 d . . .
 C4     C  -0.1686(3)  -0.3277(3)  -0.7790(3)  0.0320(8)   Uani 1.00 1 d . . .
 C5     C  -0.2437(4)  -0.2496(2)  -0.8485(3)  0.0348(9)   Uani 1.00 1 d . . .
 C6     C  -0.3010(4)  -0.2872(3)  -0.9573(3)  0.0436(10)  Uani 1.00 1 d . . .
 C7     C  -0.4780(4)  -0.0435(2)  -0.6919(3)  0.0338(8)   Uani 1.00 1 d . . .
 C8     C  -0.5810(4)  -0.0106(3)  -0.6213(3)  0.0348(9)   Uani 1.00 1 d . . .
 C9     C  -0.7613(4)  -0.0671(3)  -0.5175(3)  0.0392(9)   Uani 1.00 1 d . . .
 C10    C  -0.6882(4)  -0.1305(3)  -0.4318(3)  0.0358(9)   Uani 1.00 1 d . . .
 C11    C  -0.7005(5)  -0.1176(3)  -0.3224(3)  0.0502(12)  Uani 1.00 1 d . . .
 C12    C  -0.6346(5)  -0.1820(3)  -0.2504(3)  0.0617(13)  Uani 1.00 1 d . . .
 C13    C  -0.5550(5)  -0.2549(3)  -0.2858(3)  0.0531(12)  Uani 1.00 1 d . . .
 C14    C  -0.5472(4)  -0.2645(3)  -0.3959(3)  0.0373(9)   Uani 1.00 1 d . . .
 C15    C  -0.7981(4)  -0.0642(3)  -0.7162(3)  0.0450(10)  Uani 1.00 1 d . . .
 C16    C  -0.7733(4)  -0.1333(3)  -0.8053(3)  0.0392(9)   Uani 1.00 1 d . . .
 C17    C  -0.8353(4)  -0.1215(3)  -0.9093(3)  0.0458(10)  Uani 1.00 1 d . . .
 C18    C  -0.8092(4)  -0.1886(3)  -0.9880(3)  0.0488(11)  Uani 1.00 1 d . . .
 C19    C  -0.7179(4)  -0.2635(3)  -0.9637(3)  0.0407(9)   Uani 1.00 1 d . . .
 C20    C  -0.6603(4)  -0.2718(3)  -0.8589(3)  0.0361(9)   Uani 1.00 1 d . . .
 C21    C  -0.1893(3)  -0.2350(3)  -0.4249(2)  0.0330(9)   Uani 1.00 1 d . . .
 C22    C  -0.1311(5)  -0.1716(4)  -0.3336(3)  0.0575(12)  Uani 1.00 1 d . . .
 C23    C  0.0544(4)   -0.3398(3)  -0.5413(4)  0.0472(11)  Uani 1.00 1 d . . .
 C24    C  0.0976(4)   -0.4219(3)  -0.4672(4)  0.0569(13)  Uani 1.00 1 d . . .
 C25    C  -0.0386(4)  -0.4537(3)  -0.8553(3)  0.0402(10)  Uani 1.00 1 d . . .
 C26    C  0.0890(4)   -0.4732(3)  -0.9035(3)  0.0493(11)  Uani 1.00 1 d . . .
 C27    C  -0.4161(4)  -0.4309(3)  -1.0218(3)  0.0400(10)  Uani 1.00 1 d . . .
 C28    C  -0.5013(5)  -0.5142(3)  -0.9930(4)  0.0541(12)  Uani 1.00 1 d . . .
 H1     H  -0.2500(3)  -0.1084(2)  -0.7062(2)  0.0330(12)  Uiso 1.00 1 c . . .
 H2     H  -0.3016(3)  -0.2918(2)  -0.5974(2)  0.0296(12)  Uiso 1.00 1 c . . .
 H3     H  -0.0571(3)  -0.2271(2)  -0.6900(3)  0.0343(12)  Uiso 1.00 1 c . . .
 H4     H  -0.2273(3)  -0.3881(3)  -0.7740(3)  0.0385(13)  Uiso 1.00 1 c . . .
 H5     H  -0.1741(4)  -0.2026(2)  -0.8577(3)  0.0415(13)  Uiso 1.00 1 c . . .
 H6     H  -0.3741(4)  -0.2194(3)  -0.9837(3)  0.052(1)    Uiso 1.00 1 c . . .
 H7     H  -0.2251(4)  -0.3134(3)  -1.0017(3)  0.052(1)    Uiso 1.00 1 c . . .
 H8     H  -0.4068(4)  0.0135(2)   -0.6849(3)  0.0399(13)  Uiso 1.00 1 c . . .
 H9     H  -0.5238(4)  -0.0515(2)  -0.7659(3)  0.0401(13)  Uiso 1.00 1 c . . .
 H10    H  -0.5510(4)  0.0027(3)   -0.5414(3)  0.041(1)    Uiso 1.00 1 c . . .
 H11    H  -0.6190(4)  0.0647(3)   -0.6694(3)  0.041(1)    Uiso 1.00 1 c . . .
 H12    H  -0.8496(4)  -0.0991(3)  -0.5256(3)  0.047(1)    Uiso 1.00 1 c . . .
 H13    H  -0.7576(4)  0.0009(3)   -0.4996(3)  0.047(1)    Uiso 1.00 1 c . . .
 H14    H  -0.7660(5)  -0.0705(3)  -0.3025(3)  0.062(2)    Uiso 1.00 1 c . . .
 H15    H  -0.6406(5)  -0.1822(3)  -0.1811(3)  0.075(2)    Uiso 1.00 1 c . . .
 H16    H  -0.5105(5)  -0.3145(3)  -0.2459(3)  0.064(2)    Uiso 1.00 1 c . . .
 H17    H  -0.5009(4)  -0.3180(3)  -0.4397(3)  0.0446(13)  Uiso 1.00 1 c . . .
 H18    H  -0.8981(4)  -0.0700(3)  -0.6972(3)  0.053(1)    Uiso 1.00 1 c . . .
 H19    H  -0.8051(4)  -0.0010(3)  -0.7402(3)  0.053(1)    Uiso 1.00 1 c . . .
 H20    H  -0.8974(4)  -0.0655(3)  -0.9223(3)  0.053(1)    Uiso 1.00 1 c . . .
 H21    H  -0.8718(4)  -0.1809(3)  -1.0587(3)  0.057(2)    Uiso 1.00 1 c . . .
 H22    H  -0.7040(4)  -0.3103(3)  -1.0232(3)  0.048(1)    Uiso 1.00 1 c . . .
 H23    H  -0.5927(4)  -0.3187(3)  -0.8339(3)  0.0424(13)  Uiso 1.00 1 c . . .
 H24    H  -0.1342(5)  -0.2060(4)  -0.2672(3)  0.068(2)    Uiso 1.00 1 c . . .
 H25    H  -0.0409(5)  -0.1558(4)  -0.3437(3)  0.068(2)    Uiso 1.00 1 c . . .
 H26    H  -0.1820(5)  -0.1126(4)  -0.3319(3)  0.068(2)    Uiso 1.00 1 c . . .
 H27    H  0.0298(4)   -0.4351(3)  -0.4206(4)  0.067(2)    Uiso 1.00 1 c . . .
 H28    H  0.1129(4)   -0.4792(3)  -0.5083(4)  0.067(2)    Uiso 1.00 1 c . . .
 H29    H  0.1780(4)   -0.4040(3)  -0.4252(4)  0.067(2)    Uiso 1.00 1 c . . .
 H35    H  -0.5827(5)  -0.4894(3)  -0.9702(4)  0.064(2)    Uiso 1.00 1 c . . .
 H34    H  -0.5203(5)  -0.5556(3)  -1.0541(4)  0.065(2)    Uiso 1.00 1 c . . .
 H33    H  -0.4554(5)  -0.5509(3)  -0.9359(4)  0.065(2)    Uiso 1.00 1 c . . .
 H30    H  0.0950(4)   -0.5414(3)  -0.9198(3)  0.060(2)    Uiso 1.00 1 c . . .
 H31    H  0.0912(4)   -0.4358(3)  -0.9680(3)  0.060(2)    Uiso 1.00 1 c . . .
 H32    H  0.1622(4)   -0.4549(3)  -0.8536(3)  0.060(2)    Uiso 1.00 1 c . . .


loop_
_atom_site_aniso_label
_atom_site_aniso_U_11
_atom_site_aniso_U_22
_atom_site_aniso_U_33
_atom_site_aniso_U_12
_atom_site_aniso_U_13
_atom_site_aniso_U_23
 Cu1    0.0346(2)   0.0198(2)   0.0298(2)   0.0047(2)   -0.00734(13) -0.0047(2) 
 O1     0.0335(12)  0.0210(10)  0.0283(10)  0.0024(9)   -0.0017(9)  0.0037(9)  
 O2     0.0371(11)  0.0275(11)  0.0254(10)  -0.0030(9)  -0.0054(8)  -0.0047(8) 
 O3     0.0275(11)  0.0276(11)  0.0370(12)  -0.0021(9)  -0.0018(9)  -0.0018(10)
 O4     0.043(1)    0.0326(12)  0.041(1)    -0.0114(11) 0.0157(11)  -0.0087(11)
 O5     0.0393(10)  0.0319(10)  0.0250(9)   -0.0006(13) -0.0045(8)  -0.0024(12)
 O6     0.058(2)    0.041(1)    0.0265(12)  -0.0102(12) 0.0006(11)  -0.0077(11)
 O7     0.053(2)    0.046(2)    0.0342(13)  -0.0131(13) 0.0030(11)  0.0063(12) 
 O8     0.050(2)    0.035(2)    0.180(4)    -0.006(2)   -0.058(2)   -0.004(2)  
 O9     0.079(2)    0.030(2)    0.093(3)    -0.020(2)   0.052(2)    -0.019(2)  
 O10    0.095(2)    0.060(2)    0.0282(13)  -0.016(2)   0.005(1)    -0.0158(13)
 O11    0.0399(13)  0.0225(11)  0.047(1)    0.0049(10)  -0.0099(11) -0.0069(10)
 O12    0.037(2)    0.073(2)    0.082(2)    -0.011(2)   -0.008(1)   0.027(2)   
 O13    0.095(3)    0.027(2)    0.112(3)    0.009(2)    -0.028(2)   -0.018(2)  
 O14    0.081(3)    0.167(5)    0.087(3)    0.061(3)    0.024(2)    0.058(3)   
 O15    0.203(6)    0.095(4)    0.118(4)    -0.087(4)   -0.062(4)   0.039(3)   
 O16    0.065(2)    0.062(2)    0.104(3)    0.006(2)    0.017(2)    0.026(2)   
 N1     0.031(1)    0.0227(13)  0.040(2)    0.0035(11)  -0.0025(11) -0.0049(11)
 N2     0.0333(12)  0.024(2)    0.0327(12)  -0.0029(11) 0.0034(10)  -0.0021(12)
 N3     0.0366(13)  0.026(2)    0.0340(12)  -0.000(1)   -0.0101(10) -0.0022(13)
 N4     0.048(2)    0.030(2)    0.031(2)    0.001(1)    -0.0066(13) -0.0020(12)
 N5     0.066(3)    0.061(3)    0.037(2)    -0.009(2)   -0.004(2)   0.004(2)   
 C1     0.034(2)    0.023(2)    0.026(1)    -0.0040(13) -0.0002(12) -0.0013(12)
 C2     0.028(1)    0.023(2)    0.025(1)    -0.0040(10) -0.0026(11) -0.0026(10)
 C3     0.031(2)    0.024(1)    0.031(2)    -0.0039(12) 0.0022(12)  -0.0022(13)
 C4     0.035(2)    0.029(2)    0.032(2)    -0.005(1)   0.0087(13)  -0.0069(13)
 C5     0.045(2)    0.034(2)    0.025(2)    -0.009(1)   0.0009(13)  -0.0025(12)
 C6     0.064(2)    0.040(2)    0.027(2)    -0.011(2)   0.004(2)    -0.003(2)  
 C7     0.046(2)    0.022(2)    0.033(2)    0.001(1)    -0.004(1)   0.0078(13) 
 C8     0.039(2)    0.020(2)    0.044(2)    0.001(1)    -0.003(2)   -0.002(1)  
 C9     0.042(2)    0.026(2)    0.051(2)    0.002(1)    0.008(2)    -0.007(2)  
 C10    0.039(2)    0.026(2)    0.042(2)    -0.005(1)   0.009(2)    -0.006(1)  
 C11    0.067(3)    0.039(2)    0.049(2)    -0.008(2)   0.026(2)    -0.012(2)  
 C12    0.101(4)    0.056(3)    0.031(2)    -0.008(3)   0.020(2)    -0.003(2)  
 C13    0.079(3)    0.046(2)    0.034(2)    -0.003(2)   0.005(2)    0.004(2)   
 C14    0.047(2)    0.031(2)    0.034(2)    -0.003(2)   0.002(2)    0.003(1)   
 C15    0.045(2)    0.030(2)    0.057(2)    0.012(2)    -0.012(2)   -0.003(2)  
 C16    0.041(2)    0.029(2)    0.045(2)    0.001(2)    -0.012(2)   0.002(2)   
 C17    0.046(2)    0.042(2)    0.046(2)    0.002(2)    -0.015(2)   0.007(2)   
 C18    0.053(2)    0.052(2)    0.038(2)    -0.007(2)   -0.015(2)   0.008(2)   
 C19    0.047(2)    0.042(2)    0.032(2)    -0.009(2)   -0.004(2)   -0.001(2)  
 C20    0.046(2)    0.029(2)    0.032(2)    -0.007(2)   -0.004(1)   -0.004(1)  
 C21    0.036(2)    0.037(2)    0.026(1)    0.003(1)    -0.0010(11) -0.003(1)  
 C22    0.074(3)    0.059(3)    0.035(2)    0.002(2)    -0.015(2)   -0.014(2)  
 C23    0.029(2)    0.042(2)    0.067(3)    0.004(2)    -0.014(2)   -0.012(2)  
 C24    0.042(2)    0.061(3)    0.064(3)    0.013(2)    -0.013(2)   0.003(2)   
 C25    0.052(2)    0.033(2)    0.037(2)    -0.008(2)   0.017(2)    -0.010(2)  
 C26    0.051(2)    0.050(2)    0.050(2)    -0.009(2)   0.022(2)    -0.016(2)  
 C27    0.051(2)    0.033(2)    0.034(2)    0.006(2)    -0.006(2)   -0.007(1)  
 C28    0.072(3)    0.046(2)    0.043(2)    -0.010(2)   -0.004(2)   -0.008(2)  

#==============================================================================

_computing_data_collection            'CrystalClear'
_computing_cell_refinement            'CrystalClear'
_computing_data_reduction             'CrystalStructure'
_computing_structure_solution         'SIR92'
_computing_structure_refinement       'CRYSTALS'
_computing_publication_material       'CrystalStructure Ver. 3.00'
_computing_molecular_graphics          ?

#==============================================================================

# MOLECULAR GEOMETRY

_geom_special_details
;
    ENTER SPECIAL DETAILS OF THE MOLECULAR GEOMETRY
;

loop_
 _geom_bond_atom_site_label_1
 _geom_bond_site_symmetry_1
 _geom_bond_atom_site_label_2
 _geom_bond_site_symmetry_2
 _geom_bond_distance
 _geom_bond_publ_flag
Cu1 . O1 . 2.413(2) yes
Cu1 . O11 . 1.953(2) yes
Cu1 . N1 . 2.042(3) yes
Cu1 . N2 . 1.970(2) yes
Cu1 . N3 . 1.974(2) yes
O1 . C1 . 1.397(4) yes
O1 . C7 . 1.449(4) yes
O2 . C2 . 1.447(3) yes
O2 . C21 . 1.356(4) yes
O3 . C3 . 1.439(4) yes
O3 . C23 . 1.354(4) yes
O4 . C4 . 1.449(4) yes
O4 . C25 . 1.354(4) yes
O5 . C1 . 1.420(3) yes
O5 . C5 . 1.437(4) yes
O6 . C6 . 1.453(4) yes
O6 . C27 . 1.333(4) yes
O7 . C21 . 1.193(4) yes
O8 . C23 . 1.191(5) yes
O9 . C25 . 1.177(4) yes
O10 . C27 . 1.205(5) yes
O11 . N4 . 1.295(4) yes
O12 . N4 . 1.222(4) yes
O13 . N4 . 1.204(4) yes
O14 . N5 . 1.194(5) yes
O15 . N5 . 1.222(6) yes
O16 . N5 . 1.226(5) yes
N1 . C8 . 1.519(5) yes
N1 . C9 . 1.476(5) yes
N1 . C15 . 1.485(4) yes
N2 . C10 . 1.345(4) yes
N2 . C14 . 1.335(4) yes
N3 . C16 . 1.347(4) yes
N3 . C20 . 1.343(4) yes
C1 . C2 . 1.518(4) yes
C1 . H1 . 1.012(4) no
C2 . C3 . 1.519(4) yes
C2 . H2 . 0.995(4) no
C3 . C4 . 1.511(4) yes
C3 . H3 . 1.043(5) no
C4 . C5 . 1.522(5) yes
C4 . H4 . 1.014(5) no
C5 . C6 . 1.507(4) yes
C5 . H5 . 0.961(5) no
C6 . H6 . 1.203(7) no
C6 . H7 . 1.043(6) no
C7 . C8 . 1.485(5) yes
C7 . H8 . 1.050(5) no
C7 . H9 . 0.994(5) no
C8 . H10 . 1.026(6) no
C8 . H11 . 1.226(6) no
C9 . C10 . 1.505(5) yes
C9 . H12 . 0.983(5) no
C9 . H13 . 0.948(5) no
C10 . C11 . 1.387(5) yes
C11 . C12 . 1.375(6) yes
C11 . H14 . 0.965(6) no
C12 . C13 . 1.369(6) yes
C12 . H15 . 0.868(5) no
C13 . C14 . 1.384(5) yes
C13 . H16 . 1.028(6) no
C14 . H17 . 1.042(5) no
C15 . C16 . 1.489(5) yes
C15 . H18 . 1.055(6) no
C15 . H19 . 0.908(5) no
C16 . C17 . 1.390(5) yes
C17 . C18 . 1.379(6) yes
C17 . H20 . 0.986(6) no
C18 . C19 . 1.382(5) yes
C18 . H21 . 1.037(6) no
C19 . C20 . 1.379(5) yes
C19 . H22 . 0.993(5) no
C20 . H23 . 0.961(5) no
C21 . C22 . 1.498(5) yes
C22 . H24 . 0.950(6) no
C22 . H25 . 0.950(6) no
C22 . H26 . 0.950(6) no
C23 . C24 . 1.483(6) yes
C24 . H27 . 0.950(6) no
C24 . H28 . 0.950(6) no
C24 . H29 . 0.950(6) no
C25 . C26 . 1.486(5) yes
C26 . H30 . 0.950(6) no
C26 . H31 . 0.950(6) no
C26 . H32 . 0.950(6) no
C27 . C28 . 1.480(6) yes
C28 . H35 . 0.950(7) no
C28 . H34 . 0.950(6) no
C28 . H33 . 0.950(6) no

loop_
 _geom_angle_atom_site_label_1
 _geom_angle_site_symmetry_1
 _geom_angle_atom_site_label_2
 _geom_angle_site_symmetry_2
 _geom_angle_atom_site_label_3
 _geom_angle_site_symmetry_3
 _geom_angle
 _geom_angle_publ_flag
O1 . Cu1 . O11 . 92.57(9) yes
O1 . Cu1 . N1 . 81.95(9) yes
O11 . Cu1 . N1 . 173.82(11) yes
O1 . Cu1 . N2 . 93.65(9) yes
O11 . Cu1 . N2 . 95.44(11) yes
N1 . Cu1 . N2 . 82.11(11) yes
O1 . Cu1 . N3 . 92.46(9) yes
O11 . Cu1 . N3 . 99.93(11) yes
N1 . Cu1 . N3 . 83.25(12) yes
N2 . Cu1 . N3 . 163.18(11) yes
Cu1 . O1 . C1 . 129.49(18) yes
Cu1 . O1 . C7 . 98.57(17) yes
C1 . O1 . C7 . 113.7(2) yes
C2 . O2 . C21 . 117.3(2) yes
C3 . O3 . C23 . 116.7(3) yes
C4 . O4 . C25 . 117.5(3) yes
C1 . O5 . C5 . 112.5(2) yes
C6 . O6 . C27 . 116.4(3) yes
Cu1 . O11 . N4 . 116.1(2) yes
Cu1 . N1 . C8 . 107.2(2) yes
Cu1 . N1 . C9 . 107.7(2) yes
C8 . N1 . C9 . 109.2(3) yes
Cu1 . N1 . C15 . 108.2(2) yes
C8 . N1 . C15 . 111.8(3) yes
C9 . N1 . C15 . 112.5(3) yes
Cu1 . N2 . C10 . 114.2(2) yes
Cu1 . N2 . C14 . 125.5(2) yes
C10 . N2 . C14 . 120.0(3) yes
Cu1 . N3 . C16 . 114.0(2) yes
Cu1 . N3 . C20 . 126.4(2) yes
C16 . N3 . C20 . 119.4(3) yes
O11 . N4 . O12 . 118.8(3) yes
O11 . N4 . O13 . 118.1(3) yes
O12 . N4 . O13 . 123.1(4) yes
O14 . N5 . O15 . 123.2(6) yes
O14 . N5 . O16 . 120.2(5) yes
O15 . N5 . O16 . 116.5(5) yes
O1 . C1 . O5 . 107.8(2) yes
O1 . C1 . C2 . 108.1(2) yes
O5 . C1 . C2 . 108.8(2) yes
O1 . C1 . H1 . 109.4(3) no
O5 . C1 . H1 . 111.3(3) no
C2 . C1 . H1 . 111.3(3) no
O2 . C2 . C1 . 107.3(2) yes
O2 . C2 . C3 . 108.9(2) yes
C1 . C2 . C3 . 109.5(2) yes
O2 . C2 . H2 . 109.1(3) no
C1 . C2 . H2 . 108.9(3) no
C3 . C2 . H2 . 113.0(3) no
O3 . C3 . C2 . 109.6(2) yes
O3 . C3 . C4 . 108.4(3) yes
C2 . C3 . C4 . 109.7(2) yes
O3 . C3 . H3 . 117.1(3) no
C2 . C3 . H3 . 108.3(3) no
C4 . C3 . H3 . 103.5(4) no
O4 . C4 . C3 . 107.4(3) yes
O4 . C4 . C5 . 108.3(3) yes
C3 . C4 . C5 . 109.9(3) yes
O4 . C4 . H4 . 107.9(4) no
C3 . C4 . H4 . 113.6(4) no
C5 . C4 . H4 . 109.7(4) no
O5 . C5 . C4 . 108.0(2) yes
O5 . C5 . C6 . 107.8(3) yes
C4 . C5 . C6 . 113.6(3) yes
O5 . C5 . H5 . 116.1(4) no
C4 . C5 . H5 . 101.7(4) no
C6 . C5 . H5 . 109.8(4) no
O6 . C6 . C5 . 107.3(3) yes
O6 . C6 . H6 . 107.0(4) no
C5 . C6 . H6 . 99.1(4) no
O6 . C6 . H7 . 106.6(4) no
C5 . C6 . H7 . 110.7(4) no
H6 . C6 . H7 . 125.0(5) no
O1 . C7 . C8 . 106.7(3) yes
O1 . C7 . H8 . 111.1(3) no
C8 . C7 . H8 . 103.6(4) no
O1 . C7 . H9 . 113.4(4) no
C8 . C7 . H9 . 106.9(4) no
H8 . C7 . H9 . 114.2(4) no
N1 . C8 . C7 . 114.4(3) yes
N1 . C8 . H10 . 105.1(4) no
C7 . C8 . H10 . 117.8(4) no
N1 . C8 . H11 . 107.8(4) no
C7 . C8 . H11 . 99.5(4) no
H10 . C8 . H11 . 112.0(4) no
N1 . C9 . C10 . 109.5(3) yes
N1 . C9 . H12 . 107.6(4) no
C10 . C9 . H12 . 101.3(4) no
N1 . C9 . H13 . 107.5(4) no
C10 . C9 . H13 . 112.6(4) no
H12 . C9 . H13 . 118.0(5) no
N2 . C10 . C9 . 116.4(3) yes
N2 . C10 . C11 . 120.9(3) yes
C9 . C10 . C11 . 122.6(3) yes
C10 . C11 . C12 . 118.4(4) yes
C10 . C11 . H14 . 117.4(5) no
C12 . C11 . H14 . 123.5(5) no
C11 . C12 . C13 . 120.7(4) yes
C11 . C12 . H15 . 125.0(6) no
C13 . C12 . H15 . 114.3(6) no
C12 . C13 . C14 . 118.2(4) yes
C12 . C13 . H16 . 130.8(5) no
C14 . C13 . H16 . 109.9(5) no
N2 . C14 . C13 . 121.7(4) yes
N2 . C14 . H17 . 107.5(4) no
C13 . C14 . H17 . 130.6(5) no
N1 . C15 . C16 . 111.4(3) yes
N1 . C15 . H18 . 112.4(4) no
C16 . C15 . H18 . 110.4(4) no
N1 . C15 . H19 . 114.7(4) no
C16 . C15 . H19 . 111.4(4) no
H18 . C15 . H19 . 95.6(5) no
N3 . C16 . C15 . 117.1(3) yes
N3 . C16 . C17 . 121.1(3) yes
C15 . C16 . C17 . 121.8(3) yes
C16 . C17 . C18 . 119.0(4) yes
C16 . C17 . H20 . 117.6(5) no
C18 . C17 . H20 . 123.5(5) no
C17 . C18 . C19 . 119.8(3) yes
C17 . C18 . H21 . 113.2(5) no
C19 . C18 . H21 . 126.6(5) no
C18 . C19 . C20 . 118.5(4) yes
C18 . C19 . H22 . 116.3(5) no
C20 . C19 . H22 . 125.1(4) no
N3 . C20 . C19 . 122.1(3) yes
N3 . C20 . H23 . 112.3(4) no
C19 . C20 . H23 . 125.5(4) no
O2 . C21 . O7 . 123.6(3) yes
O2 . C21 . C22 . 110.9(3) yes
O7 . C21 . C22 . 125.5(3) yes
C21 . C22 . H24 . 109.4(5) no
C21 . C22 . H25 . 109.8(5) no
H24 . C22 . H25 . 109.5(6) no
C21 . C22 . H26 . 109.2(5) no
H24 . C22 . H26 . 109.5(6) no
H25 . C22 . H26 . 109.5(6) no
O3 . C23 . O8 . 122.1(4) yes
O3 . C23 . C24 . 111.5(3) yes
O8 . C23 . C24 . 126.4(4) yes
C23 . C24 . H27 . 109.5(5) no
C23 . C24 . H28 . 109.4(5) no
H27 . C24 . H28 . 109.5(6) no
C23 . C24 . H29 . 109.4(5) no
H27 . C24 . H29 . 109.5(6) no
H28 . C24 . H29 . 109.5(6) no
O4 . C25 . O9 . 123.3(3) yes
O4 . C25 . C26 . 111.4(3) yes
O9 . C25 . C26 . 125.3(4) yes
C25 . C26 . H30 . 109.4(5) no
C25 . C26 . H31 . 109.5(5) no
H30 . C26 . H31 . 109.5(5) no
C25 . C26 . H32 . 109.5(5) no
H30 . C26 . H32 . 109.5(5) no
H31 . C26 . H32 . 109.5(5) no
O6 . C27 . O10 . 122.5(4) yes
O6 . C27 . C28 . 111.9(3) yes
O10 . C27 . C28 . 125.6(3) yes
C27 . C28 . H35 . 109.5(5) no
C27 . C28 . H34 . 109.7(5) no
H35 . C28 . H34 . 109.5(6) no
C27 . C28 . H33 . 109.2(5) no
H35 . C28 . H33 . 109.5(6) no
H34 . C28 . H33 . 109.5(6) no

loop_
 _geom_torsion_atom_site_label_1
 _geom_torsion_site_symmetry_1
 _geom_torsion_atom_site_label_2
 _geom_torsion_site_symmetry_2
 _geom_torsion_atom_site_label_3
 _geom_torsion_site_symmetry_3
 _geom_torsion_atom_site_label_4
 _geom_torsion_site_symmetry_4
 _geom_torsion
 _geom_torsion_publ_flag
N1 . Cu1 . O11 . N4 . 173.3(30) yes
N2 . Cu1 . O11 . N4 . 107.0(4) yes
N3 . Cu1 . O11 . N4 . -66.2(5) yes
O11 . Cu1 . N1 . C8 . 22.4(31) yes
O11 . Cu1 . N1 . C9 . -95.0(30) yes
O11 . Cu1 . N1 . C15 . 143.1(28) yes
N2 . Cu1 . N1 . C8 . 89.4(4) yes
N2 . Cu1 . N1 . C9 . -28.0(4) yes
N2 . Cu1 . N1 . C15 . -149.9(4) yes
N3 . Cu1 . N1 . C8 . -98.9(4) yes
N3 . Cu1 . N1 . C9 . 143.7(4) yes
N3 . Cu1 . N1 . C15 . 21.8(4) yes
O11 . Cu1 . N2 . C10 . -166.7(4) yes
O11 . Cu1 . N2 . C14 . 6.4(5) yes
N1 . Cu1 . N2 . C10 . 19.1(4) yes
N1 . Cu1 . N2 . C14 . -167.8(5) yes
N3 . Cu1 . N2 . C10 . -10.7(14) yes
N3 . Cu1 . N2 . C14 . 162.4(10) yes
O11 . Cu1 . N3 . C16 . 169.3(4) yes
O11 . Cu1 . N3 . C20 . -6.0(6) yes
N1 . Cu1 . N3 . C16 . -16.0(5) yes
N1 . Cu1 . N3 . C20 . 168.6(5) yes
N2 . Cu1 . N3 . C16 . 13.6(14) yes
N2 . Cu1 . N3 . C20 . -161.8(9) yes
C7 . O1 . C1 . O5 . -80.4(5) yes
C7 . O1 . C1 . C2 . 162.1(4) yes
C1 . O1 . C7 . C8 . -170.3(4) yes
C21 . O2 . C2 . C1 . 142.2(4) yes
C21 . O2 . C2 . C3 . -99.3(5) yes
C2 . O2 . C21 . O7 . -0.8(6) yes
C2 . O2 . C21 . C22 . 179.0(4) yes
C23 . O3 . C3 . C2 . -100.8(5) yes
C23 . O3 . C3 . C4 . 139.5(5) yes
C3 . O3 . C23 . O8 . -6.2(7) yes
C3 . O3 . C23 . C24 . 173.3(4) yes
C25 . O4 . C4 . C3 . 118.2(5) yes
C25 . O4 . C4 . C5 . -123.2(5) yes
C4 . O4 . C25 . O9 . 2.7(7) yes
C4 . O4 . C25 . C26 . -176.9(4) yes
C5 . O5 . C1 . O1 . 178.6(4) yes
C5 . O5 . C1 . C2 . -64.4(5) yes
C1 . O5 . C5 . C4 . 64.1(5) yes
C1 . O5 . C5 . C6 . -172.8(4) yes
C27 . O6 . C6 . C5 . -162.3(5) yes
C6 . O6 . C27 . O10 . 0.1(8) yes
C6 . O6 . C27 . C28 . 179.4(5) yes
Cu1 . O11 . N4 . O12 . 2.0(5) yes
Cu1 . O11 . N4 . O13 . -179.4(3) yes
Cu1 . N1 . C8 . C7 . 38.0(4) yes
C9 . N1 . C8 . C7 . 154.5(4) yes
C15 . N1 . C8 . C7 . -80.3(6) yes
Cu1 . N1 . C9 . C10 . 31.7(4) yes
C8 . N1 . C9 . C10 . -84.4(5) yes
C15 . N1 . C9 . C10 . 150.8(5) yes
Cu1 . N1 . C15 . C16 . -23.9(4) yes
C8 . N1 . C15 . C16 . 93.8(5) yes
C9 . N1 . C15 . C16 . -142.8(5) yes
Cu1 . N2 . C10 . C9 . -5.4(4) yes
Cu1 . N2 . C10 . C11 . 172.1(4) yes
C14 . N2 . C10 . C9 . -178.9(4) yes
C14 . N2 . C10 . C11 . -1.4(7) yes
Cu1 . N2 . C14 . C13 . -171.7(3) yes
C10 . N2 . C14 . C13 . 1.1(7) yes
Cu1 . N3 . C16 . C15 . 6.1(5) yes
Cu1 . N3 . C16 . C17 . -173.2(4) yes
C20 . N3 . C16 . C15 . -178.2(4) yes
C20 . N3 . C16 . C17 . 2.5(7) yes
Cu1 . N3 . C20 . C19 . 173.0(3) yes
C16 . N3 . C20 . C19 . -2.1(7) yes
O1 . C1 . C2 . O2 . -66.9(4) yes
O1 . C1 . C2 . C3 . 175.0(3) yes
O5 . C1 . C2 . O2 . 176.3(3) yes
O5 . C1 . C2 . C3 . 58.2(4) yes
O2 . C2 . C3 . O3 . 69.1(4) yes
O2 . C2 . C3 . C4 . -172.0(3) yes
C1 . C2 . C3 . O3 . -173.9(4) yes
C1 . C2 . C3 . C4 . -55.0(5) yes
O3 . C3 . C4 . O4 . -67.4(4) yes
O3 . C3 . C4 . C5 . 175.1(3) yes
C2 . C3 . C4 . O4 . 173.0(3) yes
C2 . C3 . C4 . C5 . 55.4(5) yes
O4 . C4 . C5 . O5 . -175.3(3) yes
O4 . C4 . C5 . C6 . 65.2(5) yes
C3 . C4 . C5 . O5 . -58.4(5) yes
C3 . C4 . C5 . C6 . -177.9(4) yes
O5 . C5 . C6 . O6 . -63.8(4) yes
C4 . C5 . C6 . O6 . 55.8(6) yes
O1 . C7 . C8 . N1 . -64.9(5) yes
N1 . C9 . C10 . N2 . -18.5(6) yes
N1 . C9 . C10 . C11 . 164.2(5) yes
N2 . C10 . C11 . C12 . -0.2(7) yes
C9 . C10 . C11 . C12 . 177.0(5) yes
C10 . C11 . C12 . C13 . 2.3(8) yes
C11 . C12 . C13 . C14 . -2.7(9) yes
C12 . C13 . C14 . N2 . 1.0(8) yes
N1 . C15 . C16 . N3 . 12.7(6) yes
N1 . C15 . C16 . C17 . -168.0(4) yes
N3 . C16 . C17 . C18 . -0.1(7) yes
C15 . C16 . C17 . C18 . -179.3(5) yes
C16 . C17 . C18 . C19 . -2.8(8) yes
C17 . C18 . C19 . C20 . 3.2(8) yes
C18 . C19 . C20 . N3 . -0.8(8) yes

#==============================================================================

# Additional structures and associated data_? identifiers
# should be added at this point if there is more than one 
# structure analysis in the CIF.

#==============================================================================

#     End of CIF

#==============================================================================
